# Supplementary material for: Response surface optimization and artificial neural network modeling of biodiesel production from crude mahua (Madhuca indica) oil under supercritical ethanol conditions using CO2 as co-solvent
Source: Royal Society of Chemistry journal article supplement (doi:10.1039/c5ra11911a), 2015-01-01
Supplement: c5ra11911a1.pdf [file c5ra11911a1.pdf]

## Supplementary material

**Response surface optimization and Artificial neural network modeling of biodiesel production from crude Mahua (*Madhuca indica*) oil under supercritical ethanol condition using CO<sub>2</sub> as co-solvent**

**Antaram N. Sarve\*, Mahesh N. Varma, Shriram S. Sonawane**

Department of Chemical Engineering, Visvesvaraya National Institute of Technology (VNIT),  
South Ambazari Road, Nagpur (M.H.) 440010, India

**\* Corresponding author:**

**A. N. Sarve**

Department of Chemical Engineering, Visvesvaraya National Institute of Technology (VNIT),  
South Ambazari Road, Nagpur (M.H.) 440010, India

E-mail address: anant4u87@gmail.com

Phone No: 07122801646

**Fig. S1.** Experimental setup

### 1. GC Analysis:

The FAEE content (mass concentration) in the product was measured by the GC analysis according to the EN 14103 test method. In this test method the methyl heptadecanoate and n-heptane were replaced with hexanoic acid and n-hexane internal standard and solvent, respectively. To measure the biodiesel content in the final product, a standard solution was prepared as 10 mg ml<sup>-1</sup> hexanoic acid with n-hexane solution at first. Then 250 mg of sample was added to 5ml of standard solution and the mixture was injected to GC column. The FAEE content and % conversion were determined by using following equation:

$$Y_{ester} (\%) = \frac{\sum A - A_s}{A_s} \times \frac{C_s V_s}{m} \times 100$$

where  $\sum A$  is the summation of GC peak areas of methyl esters (C16:0-C18:2),  $A_s$  is the GC peak area of hexanoic acid (internal STD),  $C_s$  is the concentration of STD solution (10 mg ml<sup>-1</sup>),  $V_s$  is the volume of STD solution (5 ml), and  $m$  is the amount of sample (250 mg).

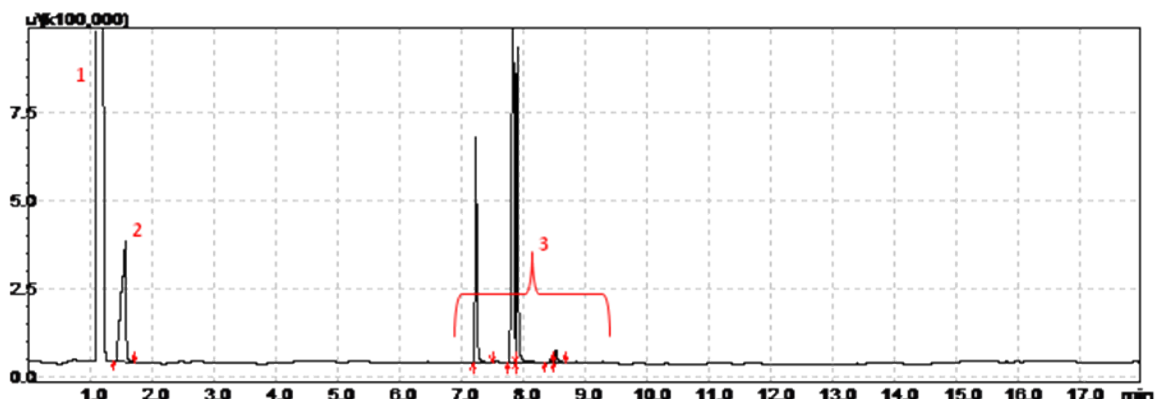

**Fig. S2.** The GC chromatogram of biodiesel from Mahua oil 1) hexane 2) hexanoic acid 3) fatty acid ethyl esters (FAEE) of Mahua oil

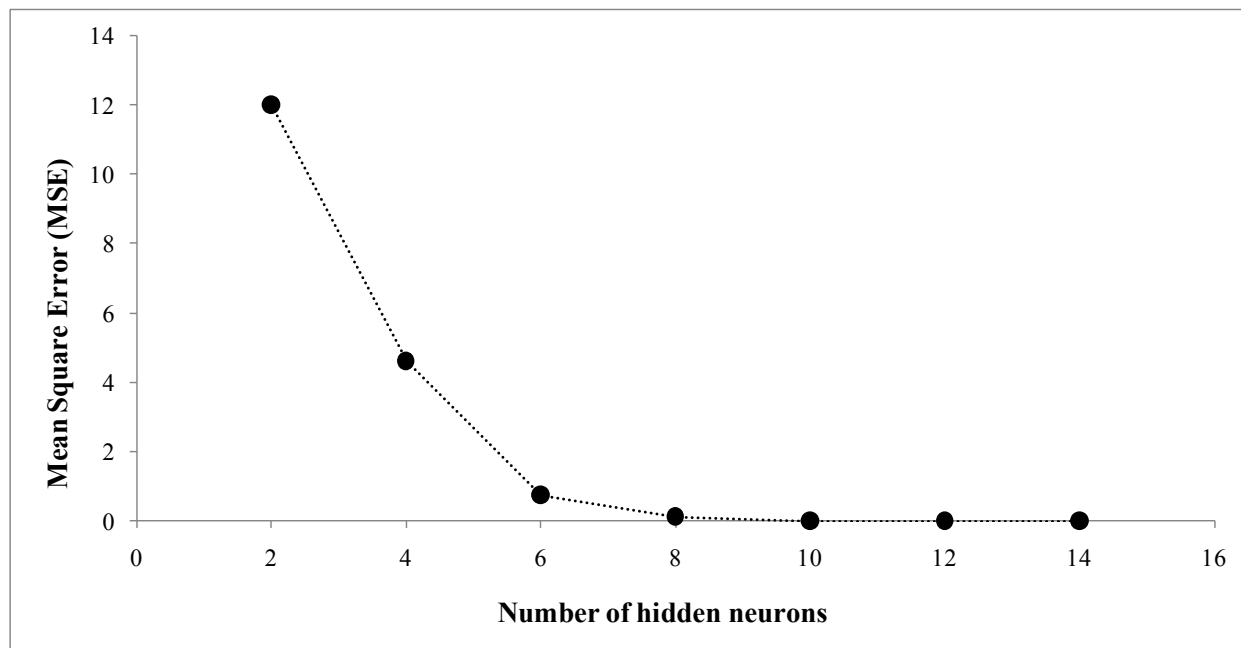

**Fig. S3.** Effect of number of neurons in hidden layer on the Mean Square Error

**Table S1.** Fatty acid composition of Mahua (*Madhuca indica*) oil [5]

| <b>Fatty Acid<br/>Composition</b> | <b>Structure</b> | <b>Composition<br/>in %</b> |
|-----------------------------------|------------------|-----------------------------|
| Palmatic                          | 16:0             | 16-28.2                     |
| Stearic                           | 18:0             | 20-25.1                     |
| Oleic                             | 18:1             | 41-51                       |
| Linoleic                          | 18:2             | 8.9-13.7                    |
| Arachidic                         | 20:0             | 0-3.3                       |

**Table S2.** Process variables and their levels used in CCD

| <b>variables</b>                       | <b>Symbol<br/>coded</b> | <b>Range and levels</b> |           |          |          |          |
|----------------------------------------|-------------------------|-------------------------|-----------|----------|----------|----------|
|                                        |                         | <b>-2</b>               | <b>-1</b> | <b>0</b> | <b>1</b> | <b>2</b> |
| Temperature ( °C )                     | <i>A</i>                | 250                     | 275       | 300      | 325      | 350      |
| Ethanol/oil molar ratio (v/v)          | <i>B</i>                | 15:1                    | 20:1      | 25:1     | 30:1     | 35:1     |
| Reaction time (min)                    | <i>C</i>                | 10                      | 20        | 30       | 40       | 50       |
| Initial CO <sub>2</sub> pressure (bar) | <i>D</i>                | 10                      | 20        | 30       | 40       | 50       |
